# Supplementary material for: AaCaMKs Positively Regulate Development, Infection Structure Differentiation and Pathogenicity in Alternaria alternata, Causal Agent of Pear Black Spot
Source: MDPI journal article supplement (doi:10.3390/ijms24021381), 2023-01-10
Supplement: s1 [file s1]

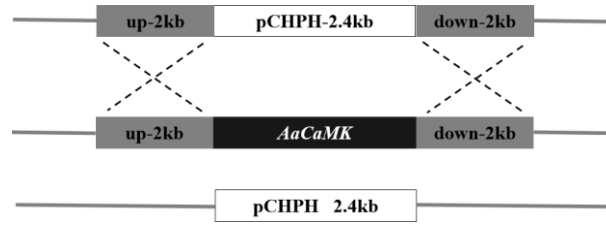

**Figure S1.** Strategy of homologous recombination knockout of *AaCaMKs*. The target fragment was recovered through a HPH (Hygromycin B) resistance gene cassette and transformed into wild-type protoplasts.

**Table S1.** Primers used for knockout vector construction.

| Gene                 | Sequence (5'-3')                                                                                               |
|----------------------|----------------------------------------------------------------------------------------------------------------|
| <i>AaCaMK1</i> -up   | F:ACAGCTATGACCATGATTACGAGCTC<br>GGCGAGGACGGTGAAGAT<br>R:GATCCCCGGGTACCGAGCTCGAGCTC<br>TCGGGTCAGCAACAAAGG       |
| <i>AaCaMK1</i> -down | F:TTGCCTAACTCGGCGCGCCGAAGCTTG<br>AGGTGCCATTTCCCAAGT<br>R:GTAAAACGACGGCCAGTGCCAAGCTT<br>TATGCGGAGAACGCTGTG      |
| <i>AaCaMK2</i> -up   | F:ACAGCTATGACCATGATTACGAATTCCC<br>GCTGACCACGGGTAAGTT<br>R:GATCCCCGGGTACCGAGCTCGAATTCC<br>GGAAGTGTTGTAGCAGGAGT  |
| <i>AaCaMK2</i> -down | F:TTGCCTAACTCGGCGCGCCGAAGCTTGA<br>GATGATACAGGAGCAAGAGC<br>R:GTAAAACGACGGCCAGTGCCAAGC<br>TTCTAAATGCGAGTGCCAAGAC |
| <i>AaCaMK3</i> -up   | F:ACAGCTATGACCATGATTACGAA<br>TTCGGGGATGTTTGGGTTTCAG<br>R:GATCCCCGGGTACCGAGCTCGAAT<br>TCTTAGACCGTGCTCTGTTGA     |
| <i>AaCaMK3</i> -down | F:TTGCCTAACTCGGCGCGCCGAAGCT<br>TAGGTATTGTGGCTTGTTT<br>R:GTAAAACGACGGCCAGTGCCAAGCT<br>TGGTCGTGTCGAGGGTAGA       |

**Table S2.** The transformants were selected using PDA plates containing 0.08 g L-1 hygromycin B, and then screened by PCR.

| Gene           | Sequences                                         |
|----------------|---------------------------------------------------|
| <i>AaCaMK1</i> | F: ATGCTCAACAAGCTGCACGG<br>R: TCATCGCTTACCCACAGGC |
| <i>AaCaMK2</i> | F: ATGGCGACAAGGACTTCGAA<br>R: TCATCGCTTACCCACAGGC |
| <i>AaCaMK3</i> | F: ATGTCACCCTCCCCTACGCC                           |

|             |                          |
|-------------|--------------------------|
|             | R: CTAACCTACCAACCGGCGTCC |
| <i>OliC</i> | R:ATGTTGGCGACCTCGTATT    |
| <i>TrpC</i> | F: CCCGTAGCAAGGTAGTCAG   |

**Table S3.** The primers used for qRT-PCR

| Gene              | Sequences                                          |
|-------------------|----------------------------------------------------|
| <i>AaCaMK1-DL</i> | F: ATACCGCTTCGGAAAGACAC<br>R: CTCCAATCATCGTAGACCA  |
| <i>AaCaMK2-DL</i> | F: CGCCAAGGTCATCAACAAGC<br>R: CACCAGCGTCAGATTCGTAA |
| <i>AaCaMK3-DL</i> | F: CTACACCTCGCAACCTTCTC<br>R: GCCAATCTCCTGCTTGACTA |
| <i>GAPDH</i>      | R: CTTACTGCCTCCACCAACTG<br>F: TGACGTTGGAAGGAGCGAAG |

**Table S4.** Primers used for complementation vectors.

| Gene             | Sequences                                                                                                     |
|------------------|---------------------------------------------------------------------------------------------------------------|
| <i>AaCaMK1-N</i> | F:GCATGGACGAGCTGTACAAGGAGCTCATGCTC<br>AACAAGCT GCACGG<br>R:ATGGAGCTATTAAATCACTATCTAGATCACTTC<br>TTCACGGGCTCCG |
| <i>AaCaMK2-N</i> | F:GCATGGACGAGCTGTACAAGGAGCTCATGGCG<br>ACAAGGACTTCGAA<br>R:ATGGAGCTATTAAATCACTATCTAGATCATCGC<br>TTACCCACAGGC   |
| <i>AaCaMK3-N</i> | F:GCATGGACGAGCTGTACAAGGAGCTCATGTCA<br>CCCTCCCCTACGCC<br>R:ATGGAGCTATTAAATCACTATCTAGACTAACTA<br>CCAACCGGCGTCC  |
| N-CX             | R:CGACAACCAC TACCTGAGCA<br>F:TGAAGGGCGT ACTAGGGTTG                                                            |
